# Supplementary material
Source: PubMed Central journal article supplement (PMC5682619)
Supplement: ml7b00164_si_001.pdf [file ml7b00164_si_001.pdf]

# **Discovery of Indolinone-based Multi-kinase Inhibitors as Potential Therapeutics for Idiopathic Pulmonary Fibrosis**

Zhenhua Huang<sup>†</sup>, Heran Li<sup>†</sup>, Qian Zhang<sup>‡</sup>, Fangzheng Lu<sup>†</sup>, Mei Hong<sup>‡</sup>, Zhigang Zhang<sup>‡</sup>, XiaocuiGuo<sup>‡</sup>, Yuanju Zhu<sup>‡</sup>, Sanming Li<sup>†</sup> and Hongzhuo Liu<sup>†\*</sup>

<sup>†</sup>School of Pharmacy, Shenyang Pharmaceutical University, Shenyang, P. R. China;

<sup>‡</sup> KBP Biosciences, 401, Buliding 2, Jinan Pharm Valley, North Section of Gangxing Three Road, Jinan,, Shandong,250101, P. R. China

## Experimental details and characterization for compounds

Experiments were generally conducted under inert atmosphere unless otherwise noted. Commercial solvents and reagents were generally used without further purification. All final products were characterized by  $^1\text{H}$  NMR, LCMS and HPLC methods.  $^1\text{H}$  NMR was recorded on a Bruker 400 spectrometer in the indicated solvent. Chemical shift ( $\delta$ ) were reported in parts per million relative to the internal standard tetramethylsilane. Tandem liquid chromatography/mass spectrometry (LCMS) was performed on Agilent 1260 separations module and Agilent 6120 mass detector. Compound purity and identity were determined by HPLC at 214 nm. Products were purified by column chromatography on silica gel by using the solvent systems indicated.

### Synthesis of the key intermediates **5**

5-nitroindoline (164 g, 1 mol) was dissolved in 1 L DCM, and triethylamine (151.5 g, 1.5 mol) was added at  $-20^\circ\text{C}$ . The mixture was stirred for 30 min and then 2-chloroacetyl chloride (134 g, 1.2 mol) was added dropwise. After 2 h HPLC analysis showed complete conversion, water were allowed to added the reaction system and the organic layer was separated, dried under vacuum to yield **5** (220 g, 91%).

### General methods for the preparation and analytical data for compounds illustrated in Table 1.

#### (Z)-3-((1-(2-(dimethylamino)ethanoyl)indole-5-amide)(phenyl)methylene)-2-oxoindoline-6- carboxylate (compound **9a**) and its hydrochloride

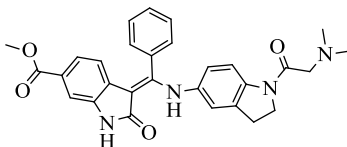

#### Step 1: 1-(2-(dimethylamino)ethanoyl)-5-nitroindoline (**6a**)

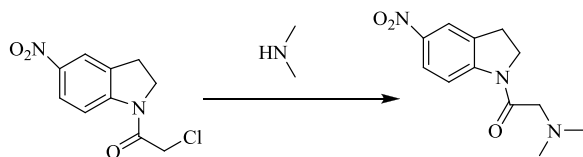

1-(2-chloroacetyl)-5-nitroindoline (Compound **5**, 22 g, 91 mmol), dimethylamine hydrochloride (22 g, 270 mmol) and  $K_2CO_3$  (32.5 g, 235 mmol) were combined in toluene (200 mL). The reaction mixture was allowed to stir at 70°C overnight and then concentrated in vacuum to provide the crude product. The solid product was purified by silica gel chromatography (Eluant: 10% methanol in DCM) to give the product (50% yield).

### Step 2: 1-(2-(dimethylamino)ethanoyl)-5-aminoindolin (**7a**)

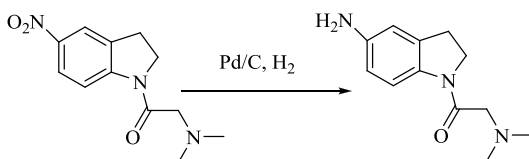

A heterogeneous mixture of 1-(2-(dimethylamino)ethanoyl)-5-nitroindoline (5 g, 20.1 mmol) and Pd/C (1 g) in methanol (200 mL) was allowed to react under  $H_2$  atmosphere at RT overnight. The organic solvent was then moved by rotary evaporator to give the product as white solid (5 g, 99% yield).

### Step 3:

**(Z)-3-((1-(2-(dimethylamino)ethanoyl)indole-5-amide)(phenyl)methylene)-2-oxoindoline-6-carboxylate (compound **9a**) and its hydrochloride**

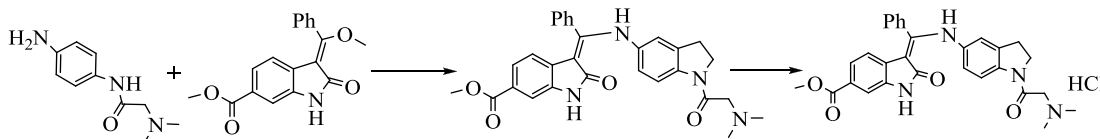

(*E*)-3-(methoxyl(phenyl)methylene)-2-oxoindoline-6-carboxylate (86 mg, 0.278 mmol) and 1-(2-(dimethylamino)ethanoyl)-5-aminoindoline (82 mg, 0.374 mmol) were combined in methanol (2 mL). The resulting solution was stirred at 70°C for 7 h. Afterwards, the mixture was filtered and washed with cooled methanol to give **9a** (61 mg, 35.4% yield, 98.39% purity) as a yellow solid at RT. The obtained product was dissolved in 10 mL methanol, 1 mL of concentrated hydrochloric acid was

added at RT. The reaction was stirred for 1 h and then the resulting solution was filtered and washed with cooled methanol to its hydrochloride. LCMS(m/z) for  $C_{29}H_{28}N_4O_4$  497.3 (M+1).  $^1H$ -NMR ( $C_{29}H_{28}N_4O_4 \cdot HCl$ , DMSO- $d_6$ , 400MHz,  $\delta$ ; ppm): 12.16 (s, 1H), 10.96 (s, 1H), 9.77 (br. s., 1H), 7.79 (d, J = 8.8 1H), 7.56 (m, 3H), 7.45 (m, 2H), 7.26 (s, 1H), 7.17(m, 1H), 6.88 (s, 1H), 6.74 (s, 1H), 5.81 (d, J = 8.4, 1H), 4.25 (m, 2H), 3.96 (m, 2H), 3.76 (s, 3H), 3.04 (m, 2H), 2.83 (m, 6H).

**(Z)-3-((1-(2-(2,6-dimethylmorpholine)ethanoyl)dihydroindole-5-amide)(phenyl)methylene)-2-oxoindoline-6-carboxylate (compound 9b) and its hydrochloride**

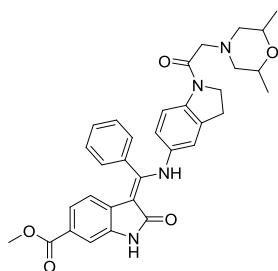

**Step 1: 2-(2,6-dimethylmorpholine)-1-(5-nitroindole-1-yl)ethanone (6b)**

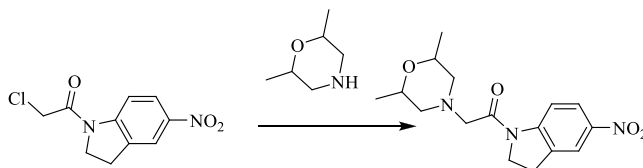

To a solution of compound **5** (1.0 g, 4.2 mmol) and 2,6-dimethylmorpholine (1.15 g, 10 mmol) in DCM (50 mL) was added trimethylamine (1 mL, 7 mmol) dropwise. The reaction was allowed to stir at RT for 1 h. The reaction mixture was partitioned between DCM and water. The organic layer was washed with water, dried, concentrated and the product was used in the next step without purification.

**Step 2: 1-(5-amidedihydroindole-1-)-2-(2,6-dimethylmorpholine)ethanone (7b)**

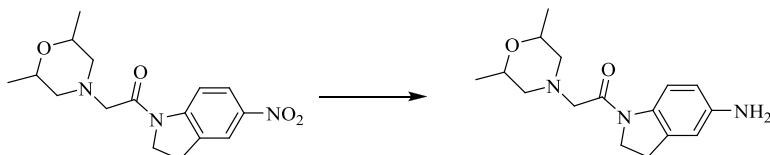

To a solution of the crude product (2-(2,6-dimethylmorpholine)-1-(5-nitroindole-1-yl)ethanone) in methanol (50 mL) was added Pd/C (0.2 g). The reaction mixture was allowed to stir

under H<sub>2</sub> atmosphere for 2 h, filtered and concentrated. The resulted filtrate was used in the next step without purification.

**Step 3: (Z)-3-((1-(2-(2,6-dimethylmorpholine)ethanoyl)dihydroindole-5-amide)(phenyl)methylene)-2-oxoindoline-6-carboxylate(compound 9b) and its hydrochloride**

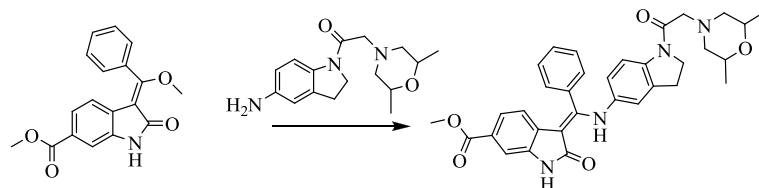

To a solution of the crude product from above step 1-(5-amidedihydroindole-1-yl)-2-(2,6-dimethylmorpholine)ethanone(82 mg, 0.28 mmol) and (*E*)-3-(methoxy(phenyl)methylene)-2-oxoindoline-6-carboxylate (1.0 g, 3.2 mmol) in methanol (50 mL) was added KOH (57 mg, 1 mmol). The mixture was allowed to react at 60°C for 2 h. Then the reaction mixture was washed with water and the product was extracted by DCM, which was further dried and concentrated. The resulted product was purified by silica gel chromatography (Eluant: 1% methanol in DCM) to give **9b**. The obtained **9b** was dissolved in 20 mL DCM, 1 mL hydrochloric acid (2N) was added at RT to give its hydrochloride as yellow solid (132 mg, 7.4% yield, 91.79% purity). LCMS(m/z) for C<sub>33</sub>H<sub>34</sub>N<sub>4</sub>O<sub>5</sub> 567.1 (M+1). <sup>1</sup>H-NMR (C<sub>33</sub>H<sub>34</sub>N<sub>4</sub>O<sub>5</sub>·HCl, DMSO-*d*<sub>6</sub>, 400MHz, δ; ppm): 12.13 (s, 1H), 10.95 (s, 1H), 10.50 (s, 1H), 7.79 (s, 1H), 7.51 (m, 6H), 7.18 (s, 1H), 6.89 (s, 1H), 6.74 (s, 1H), 5.81 (s, 1H), 4.29 (s, 2H), 3.98 (s, 4H), 3.76 (m, 3H), 3.16 (s, 2H), 3.06 (t, 2H), 2.74 (d, 2H), 1.09 (d, 6H).

**(Z)-3-((1-(2-(2-pyrrolidone-1-yl)acetyl)dihydroindole-5-amide)(phenyl)methylene)-2-oxoindoline-6-carboxylate (compound 9c)**

The compound **6c** and **7c** were prepared according Scheme 1 (analogous to **6b** and **7b**).

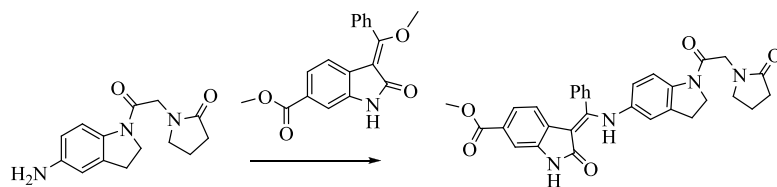

To a solution of (Z)-3-(methoxy(phenyl)methylene)-2-oxoindoline-6-carboxylate (183 mg, 0.59 mmol) and (1-(5-amidedihydroindole-1-yl)-2-(2-pyrrolidone)ethanone)(170 mg, 0.66 mmol) in methanol (20 mL) was added KOH(30 mg, 0.54 mmol). The mixture was allowed to react at RT for 12 h. Then the reaction mixture was washed with water and the product was extracted by DCM, which was further dried and concentrated. The resulted product was purified by silica gel chromatography (Eluant: 2% methanol in DCM) to give the compound **9c** as yellow solid (90 mg, 43% yield, 92.23% purity). LCMS(m/z) for  $C_{31}H_{28}N_4O_5$  537 (M+1).  $^1H$ -NMR ( $C_{31}H_{28}N_4O_5$ , DMSO- $d_6$ , 400MHz,  $\delta$ ; ppm): 12.15 (s, 1H), 10.93 (s, 1H), 7.73 (d, 1H), 7.55 (m, 3H), 7.43-7.40 (m, 2H), 7.41 (d, 1H), 7.17 (d, 1H), 6.83 (d, 1H), 6.67 (d, 1H), 5.81 (d, 1H), 4.10 (s, 2H), 4.04(t, 2H), 3.75(s, 3H), 3.00 (t, 2H), 2.24 (m, 2H), 1.95(m, 2H), 1.22(m, 2H).

**(Z)-3-((1-(2-(1H-1,2,4-triazole-1-yl)acetyl)dihydroindole-5-amide)(phenyl)methylene)-2-oxoindoline-6-carboxylate (compound 9d) and its hydrochloride**

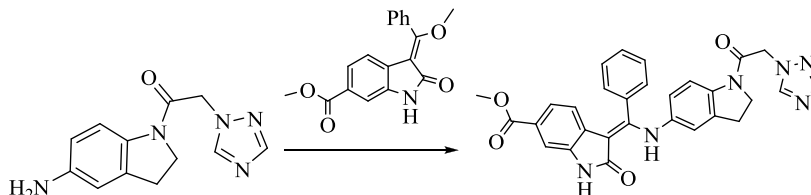

The compound **6d** and **7d** were prepared according Scheme 1(analogous to **6b** and **7b**).

To a solution of (Z)-3-(methoxy(phenyl)methylene)-2-oxoindoline-6-carboxylate (3.2g, 10.3 mmol) and (1-(5-amidedihydroindole-1-yl)-2-(1H-1,2,4-triazole)ethanone (2.6 g, 10.7 mmol) in methanol (50 mL) was added KOH (203 mg, 3.6 mmol). The mixture was allowed to react at 60°C for 2 h. Then the reaction mixture was cooled and washed with water and the product was extracted by methanol, which was further dried and concentrated to give the compound **9d**. The obtained **9d** was dissolved in 200 mL DCM and 50 mL methanol, 15mL of hydrochloric acid (1N) was added at RT to give its hydrochloride as yellow solid (5.2 g, 89% yield, 96.02% purity). LCMS(m/z) for  $C_{29}H_{24}N_6O_4$  521 (M+1).  $^1H$ -NMR ( $C_{29}H_{24}N_6O_4 \cdot HCl$ , DMSO- $d_6$ , 400MHz,  $\delta$ ; ppm): 12.17(s, 1H), 10.93(s, 1H), 7.80(d,

1H), 7.50(m, 6H), 7.19(m, 1H), 6.83(s, 1H), 6.69(m, 1H), 5.83(d, 1H), 4.09(s, 2H), 3.92(t, 3H), 3.76(s, 3H), 2.96(t, 2H).

**(Z)-3-((1-(2-(1H-pyrazol-1-yl)acetyl)dihydroindole-5-yl)(phenyl)methylene)-2-oxoindoline-6-carboxylate(compound 9e)**

The compound 6e and 7e were prepared according Scheme 1.

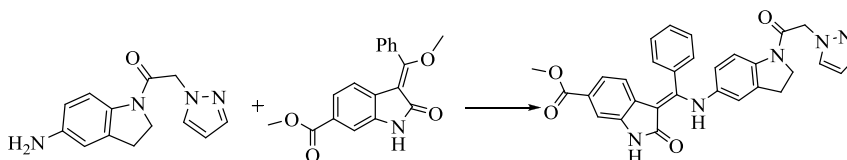

To a solution of (Z)-3-(methoxy(phenyl)methylene)-2-oxoindoline-6-carboxylate (72.5 mg, 0.234 mmol) and (1-(5-amidedihydroindole-1-yl)-2-(1H-pyrazol)ethanone (50 mg, 0.206 mmol) in methanol (20 mL) was added KOH (6 mg, 0.107 mmol). The mixture was allowed to react at RT for 4 h. Then the reaction mixture was washed with water and the product was extracted by DCM, which was further dried and concentrated. The resulted product was purified by silica gel chromatography (Eluant: 1% methanol in DCM) to give the compound **9e** as yellow solid (70 mg, 65.5% yield, 98.78% purity). LCMS(m/z) for  $C_{30}H_{25}N_5O_4$  520 (M+1).  $^1H$ -NMR ( $C_{30}H_{25}N_5O_4$ , DMSO- $d_6$ , 400MHz,  $\delta$ ; ppm): 12.09 (s, 1H), 10.93 (s, 1H), 7.69 (d, 1H), 7.64 (d, 1H), 7.52-7.54 (m, 3H), 7.42 (d, 4H), 7.14-7.18 (m, 1H), 6.83 (s, 1H), 6.65 (d, 1H), 6.26 (t, 1H), 5.80 (d, 1H), 5.14 (s, 2H), 4.09 (t, 2H), 3.74 (s, 3H), 3.01 (t, 2H).

**(Z)-3-((1-(2-morpholinoacetyl)indole-5-amide)(phenyl)methylene)-2-oxoindoline-6-carboxylate (compound 3, also named as KBP-7018) and its hydrochloride**

The compound 6 and 7 were prepared according Scheme 1.

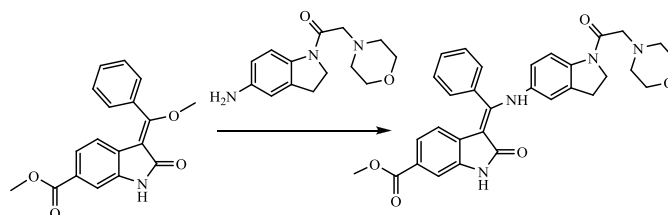

(Z)-methyl-3-(methoxy(phenyl)methylene)-2-oxoindoline-6-carboxylate (130 g, 0.5 mol) and

1-(5-aminoindolin-1-yl)-2-morpholinoethanone (154 g, 0.5 mol) were combined in methanol (1000 mL). The reaction was refluxed at RT for 12 h, then filtered and washed with cool methanol to provide the crude products. The residue was purified by silica gel chromatography (Eluant: 30% EtOAc in hexane) to afford the free base of the product (67% yield, 99.35% purity) as a yellow solid. A 1N solution of HCl in Et<sub>2</sub>O was used to make the hydrochloride salt (15 mg, 6% over three steps). LCMS(m/z) for C<sub>31</sub>H<sub>30</sub>N<sub>4</sub>O<sub>5</sub> 538.8 (M+1). <sup>1</sup>H-NMR (C<sub>31</sub>H<sub>30</sub>N<sub>4</sub>O<sub>5</sub>·HCl, DMSO-*d*<sup>6</sup>, 400MHz, δ; ppm) 12.16 (s, 1H), 10.98 (s, 1H), 10.52 (brs, 1H), 7.78 (d, J=8.4Hz, 1H), 7.56-7.59 (m, 3H), 7.44-7.46 (m, 2H), 7.42 (d, J=1.2Hz, 1H), 7.17 (dd, J=1.2Hz, 8.0Hz, 1H), 6.88 (s, 1H), 6.74 (dd, J=1.6Hz, 8.4Hz, 1H), 4.36 (brs, 2H), 3.81-4.02 (m, 6H), 3.75 (s, 3H), 3.41 (m, 2H), 3.21 (m, 2H), 3.04 (t, J=8Hz, 1H).

**General methods for the preparation and analytical data for compounds illustrated in Table 2.**

**(*S,Z*)-3-((4-(2-((4-methylpiperazine-1-yl)methyl)-5-carbonylpyrrolidine-1-yl)(phenyl)amide)methylene)-2-carboxylindole-6-carboxylate (compound 15a)**

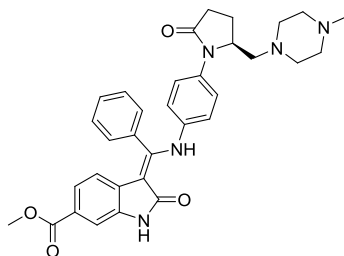

**Step 1: (*S*)-5-oxopyrrolidin-2-carboxylate**

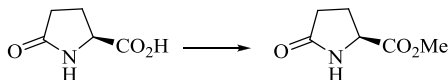

To 100 mL methanol was added 25 mL SOCl<sub>2</sub> slowly in an ice-cooled flask. (*S*)-5-oxopyrrolidin-2-methanoic acid (20 g, 0.155 mol) was dissolved in 20 mL methanol and then added to the reaction mixture dropwise. The mixture was gradually warmed to RT and allowed to stir overnight. The organic solvent was removed by rotary evaporator and the residue was taken up in ethyl acetate and saturated aqueous Na<sub>2</sub>CO<sub>3</sub>. After 1 h, the organic layer was concentrated to give the product (16 g, 72% yield). The product was directly to be used for the next step without any purification.

**Step 2: (*S*)-5-hydroxymethylpyrrolidine-2-ketone**

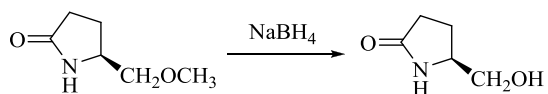

To a solution of above crude product (16 g, 0.112 mol) in ethanol (130 mL) was added NaBH<sub>4</sub> (4.25 g, 0.112 mol) in an ice-cooled flask. The reaction mixture was allowed to stir at RT overnight. Added 10% HCl solution (22 mL) and filtered. The filtrate was then concentrated to give the product (7.6 g, 59% yield). The product was directly to be used for the next step without any purification.

**Step 3: (S)-4-methylbenzenesulfonic acid-(5-pyrrolidone-2-yl)methyl ester**

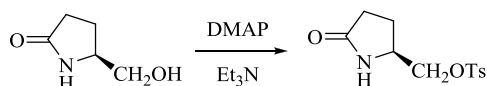

To a solution of above crude intermediates (7.6 g, 66 mmol) and TsCl (16.04 g, 84 mmol) in DCM (100 mL) under iced bath was added DMAP (1.6 g, 13 mmol) and Et<sub>3</sub>N (7.6 g, 75 mmol). The reaction mixture was allowed to stir at RT overnight. The crude mixture was purified by column chromatography to give (S)-4-methylbenzenesulfonic acid-(5-pyrrolidone-2-yl)methyl ester (12.6 g, 71% yield).

**Step 4: (S)-5-((4-methylpiperazine-1-yl)methyl)pyrrolidone-2-ketone (IIa)**

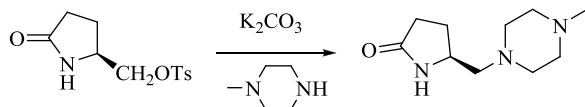

To a solution of (S)-4-methylbenzenesulfonic acid-(5-pyrrolidone-2-yl)methyl ester (5.38g , 20 mmol) and N-methylpiperazine (3.00 g, 30 mmol) in ACN (100 mL) was added K<sub>2</sub>CO<sub>3</sub> (5.6 g, 41 mmol). The reaction mixture was refluxed overnight, then filtered to remove K<sub>2</sub>CO<sub>3</sub>. The filtrate was concentrated and the residue was dissolved in DCM. The white solid after sonication process was removed and then the filtrate was concentrated to give (S)-5-((4-methylpiperazine-1-yl)methyl)pyrrolidone-2-ketone (3.2 g, 81% yield).

**Step 5: (S)-5-((4-methylpiperazine-1-yl)methyl)-1-(4-nitrophenyl)pyrrolidone-2-ketone (13 a)**

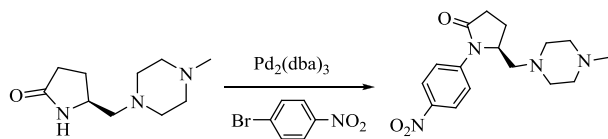

To a solution of (S)-5-((4-methylpiperazine-1-yl)methyl) pyrrolidone-2-ketone (1.6 g, 8.1 mmol), p-nitrobromobenzene (1.8 g, 8.9 mmol) and Dimethylbis(diphenylphosphino)xanthene (0.92 g, 1.6 mmol) in dioxane (20 mL) were added Cs<sub>2</sub>CO<sub>3</sub> (3.9 g, 12 mmol) and Pd<sub>2</sub>(dba)<sub>3</sub> (0.75 g, 8 mmol). The reaction mixture was refluxed overnight and the crude product was purified by column chromatography, eluting with DCM to give (S)-5-((4-methylpiperazine-1-yl)methyl)-1-(4-nitrophenyl)pyrrolidone-2-ketone (1.83 g, 72% yield).

**Step 6: (S)-5-((4-methylpiperazine-1-yl)methyl)-1-(4-aminophenyl)pyrrolidone-2-ketone (14a)**

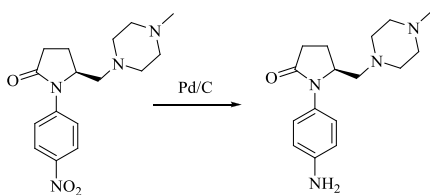

To a solution of (S)-5-((4-methylpiperazine-1-yl)methyl)-1-(4-nitrophenyl)pyrrolidone-2-ketone (1.83 g, 5.75 mmol) in methanol (20 mL) was added 10% Pd/C (183 mg). The mixture was allowed to react under H<sub>2</sub> (1 atm) atmosphere overnight, then filtrate to remove Pd/C. The filtrate was concentrated and the crude product was purified by column chromatography to give (S)-5-((4-methylpiperazine-1-yl)methyl)-1-(4-aminophenyl)pyrrolidone-2-ketone (1.5 g, 90% yield).

**Step 7: (S,Z)-3-((4-(2-((4-methylpiperazine-1-yl)methyl)-5-carboxylpyrrolidin-1-yl)(phenyl)amide)methylene)-2-carboxylindole-6-carboxylate (compound 15a)**

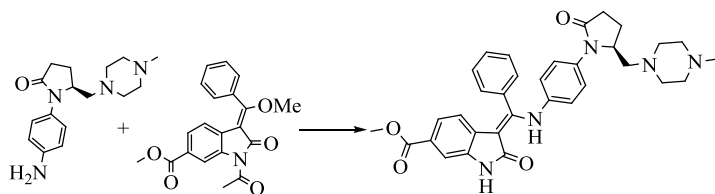

(S)-5-((4-methylpiperazine-1-yl)methyl)-1-(4-aminophenyl)pyrrolidone-2-ketone (144 mg, 0.45 mmol) and (Z)-1-acetyl-3-(methoxy(phenyl)methylene)-2-oxoindoline-6-carboxylic methyl ether (0.175 g, 0.57 mmol) were dissolved in methanol (10 mL). The reaction mixture was refluxed overnight, and washed with water and extracted by DCM. The organic layer was concentrated and the crude product was purified by preparative liquid chromatography to give compound **15a** as yellow solid (126 mg, 44% yield, 99.60% purity). LCMS(m/z) for C<sub>33</sub>H<sub>35</sub>N<sub>5</sub>O<sub>4</sub> 566.3 (M+1). <sup>1</sup>H-NMR (C<sub>33</sub>H<sub>35</sub>N<sub>5</sub>O<sub>4</sub>, DMSO-*d*<sub>6</sub>,

400MHz,  $\delta$ ; ppm): 2.02 (m, 2H), 2.32 (m, 14H), 2.63 (m, 2H), 3.86 (s, 3H), 4.22 (m, 1H), 5.96 (d, 1H), 6.78 (d, 2H), 7.24 (d, 1H), 7.37 (m, 3H), 7.44 (m, 4H), 7.82 (s, 1H), 12.15 (s, 1H).

**(Z)-3-((1-(2-(4-methylpiperazine-1-yl)-L-pyroglutamate-4-aminoethyl)(phenyl)methylene)-2-oxindolin-6-carboxylate (compound 15b)**

The compound **11b**, **13b** and **14b** were prepared according Scheme 2 (analogous to **11a**, **13a** and **14a** except for R-intermediates used).

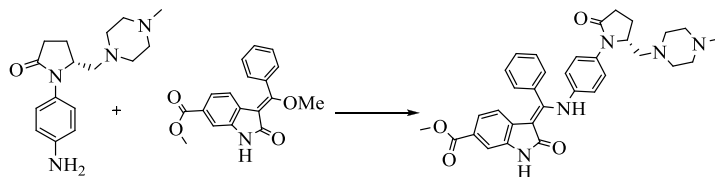

(*R*)-1-(4-aminophenyl)-5-(4-methylpiperazine-1-yl)methylpyrrolidine-2-ketone (144 mg, 0.5 mmol) was dissolved in methanol (10 mL) and (*Z*)-3-(methoxy(phenyl)methylene)-2-oxindoline-6-carboxylate (155 mg, 0.5 mmol) was added. The mixture was refluxed overnight and washed with water, followed by extraction by DCM and concentration. The resulting product was purified by preparative liquid chromatography to give compound **15b** as yellow solid (126 mg, 44% yield, 97.16% purity). LCMS(*m/z*) for  $C_{33}H_{35}N_5O_4$  566 (*M*+1).  $^1\text{H-NMR}$  ( $C_{33}H_{35}N_5O_4$ , DMSO- $d_6$ , 400MHz,  $\delta$ ; ppm): 12.15 (s, 1H), 7.97 (s, 1H), 7.57-7.51(m, 8H), 6.80 (d, 2H), 5.97 (d, 1H), 4.25 (s, 1H), 3.86 (s, 3H), 2.67-2.22 (m, 16H), 2.09-2.02 (m, 2H).

**(*R,Z*)-3-(((4-(2-((dimethylamino)methyl)-5-carboxypyrrolidine-1-yl)phenyl)(methyl)amide)(phenyl)methylene)-2-oxindoline-6-carboxylate (compound 15c) and its chloride**

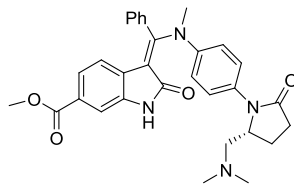

**Step 1: (*R*)-(5-oxopyrrolin-2-yl)methyl methanesulfonate**

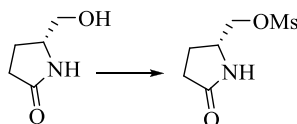

To a solution of (*R*)-5-(hydroxymethyl)pyrroline-2-ketone (23 g, 0.2mol) and TEA (56 mL) in DCM (200 mL) was added mesitylchloride dropwise (34 g, 0.3 mol). The reaction mixture was allowed to stir overnight, and filtrated to remove the solid. The resulting mixture was washed with HCl (1N), dried and then concentrated to give (*R*)-(5-oxopyrrolin-2-yl)methylmethanesulfonat (32.8 g, 85% yield).

**Step 2: (*R*)-5-(dimethylaminemethyl) pyrroline-2-ketone (*IIc*)**

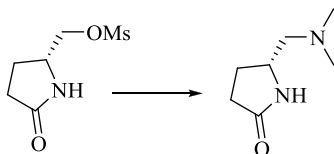

To a solution of (*R*)-(5-oxopyrrolin-2-yl)methylmethanesulfonat (5 g, 25.8 mmol) in THF (20 mL) was added 40% dimethylamine (1 mL). The reaction mixture was refluxed for 18 h and then diluted by ethyl acetate (200 ml). The resulting mixture was washed with saturated aqueous sodium chloride solution, and the solvent was removed to give (*R*)-5-(dimethylaminemethyl) pyrroline-2-ketone (3.38 g, 92% yield).

**Step 3: (*R*)-5-((dimethylamino)methyl)-1-(4-nitrophenyl)pyrroline-2-ketone (*13c*)**

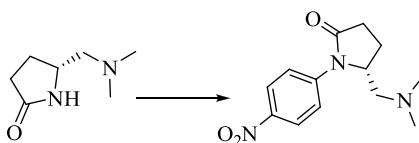

To a solution of (*R*)-5-(dimethylaminemethyl)pyrroline-2-ketone (2.7 g, 19 mmol), 4-bromonitrobenzene (4.2 g, 20 mmol) and xanphos (0.66 g, 1.14 mmol) in 1,4-dioxane (20 mL) were added Pd(dba)<sub>3</sub> (0.27 g, 0.38 mmol) and Cs<sub>2</sub>CO<sub>3</sub> (7.43 g, 22.8 mmol). The reaction mixture was refluxed at 120°C for 18 h, and the solvent was removed. The crude product was then purified by silica gel with methanol/DCM (0~1:10) to give (*R*)-5-((dimethylamino)methyl)-1-(4-nitrophenyl)pyrroline-2-ketone (2.5 g, 50% yield).

**Step 4: (*R*)-5-((dimethylamino)methyl)-1-(4-aminophenyl)pyrroline-2-ketone (*14c*)**

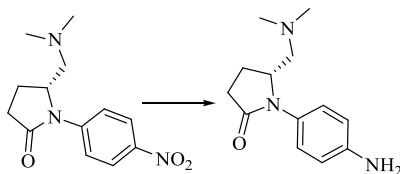

To a solution of (*R*)-5-((dimethylamino)methyl)-1-(4-nitrophenyl)pyrroline-2-one (1.2 g, 4.56 mmol) in methanol (10 mL) was added Pd/C (100 mg). The mixture was allowed to react under H<sub>2</sub> atmosphere for 72 h, and filtrated to remove Pd/C. The filtrate was concentrated to give (*R*)-5-((dimethylamino)methyl)-1-(4-aminophenyl)pyrroline-2-one (1.0 g, 99% yield).

#### Step5:

**(*R,Z*)-3-(((4-(2-((dimethylamino)methyl)-5-carboxypyrrolidine-1-yl)phenyl)(methyl)amide)(phenyl)methylene)-2-oxoindoline-6-carboxylate(compound 15c) and its chloride**

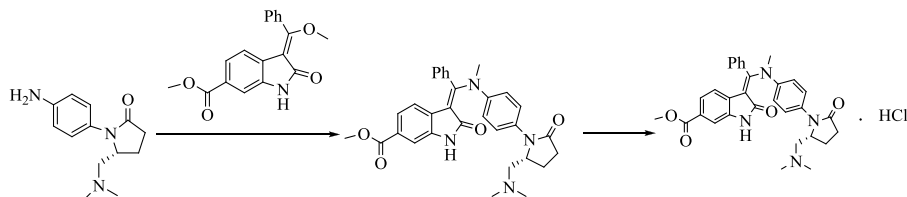

(*R*)-5-((dimethylamino)methyl)-1-(4-aminophenyl)pyrroline-2-one (82 mg, 0.35 mmol) and (*Z*)-3-(methoxy(phenyl)methylene)-2-oxoindoline-6-carboxylic methyl ether (66 mg, 0.21 mmol) were dissolved in methanol (2 mL). The reaction mixture was refluxed at 70°C for 7 h, and cooled to RT. The mixture was allowed to crystallize, filtrate, wash with methanol and dry to give (*R,Z*)-3-(((4-(2-((dimethylamino)methyl)-5-carboxypyrrolidine-1-yl)phenyl)(methyl)amide)(phenyl)methylene)-2-oxoindoline-6-carboxylate as yellow solid (53 mg, 50% yield, 97.80% purity). To the solution of above product in methanol (10 mL) was added HCl (1 mL). The mixture was allowed to stir at RT for 2 h, filtrated and dried in vacuum to give its chloride (68 mg). LCMS(*m/z*) for C<sub>31</sub>H<sub>32</sub>N<sub>4</sub>O<sub>4</sub> 524.2 (*M*+1). <sup>1</sup>H-NMR (C<sub>31</sub>H<sub>32</sub>N<sub>4</sub>O<sub>4</sub>, DMSO-*d*<sub>6</sub>, 400MHz, δ; ppm): 12.25 (s, 1H), 10.98 (s, 1H), 10.24 (brs, 1H), 7.52-7.66 (m, 4H), 7.48 (d, *J* = 6.5 Hz, 1H), 7.41 (s, 1H), 7.35 (d, *J* = 8.5 Hz, 2H), 7.19 (d, *J* = 8.3 Hz, 1H), 6.88 (d, *J* = 8.5 Hz, 2H), 5.82 (d, *J* = 8.3 Hz, 1H), 4.68 (brs, 1H), 3.76 (s, 3H), 3.25 (t, *J* = 10.3 Hz, 1H), 2.83 - 2.96 (m, 1H), 2.72 (brs, 6H), 2.62 (dt, *J* = 17.1, 8.8 Hz, 1H), 2.12 - 2.42 (m, 3H), 1.93-2.08 (m, 1H).

**(Z)-3-((4-(3-((4-methylpiperazine-1-yl)methyl)-2-oxopyrrolidin-1-yl)phenylamino)(phenyl)methylene)-2-oxoindoline-6-carboxylate (compound 17a)**

The intermediates (**11**, **13** and **14**) were prepared according Scheme 2.

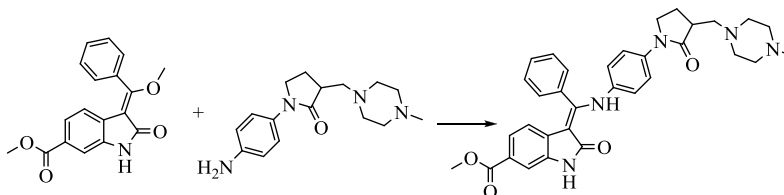

To a solution of (Z)-3-(methoxy(phenyl)methylene)-2-oxoindoline-6-carboxylic methyl ether (177 mg, 0.57 mmol) in methanol (20 mL) was added 1-(4-aminophenyl)-3-((4-methylpiperazin-1-yl)methyl)pyrrolidin-2-one (144 mg, 0.50 mmol). The reaction mixture was refluxed for 12 h. The mixture was cooled to RT, dried under reduced pressure. The residue was then purified by column chromatography to give Compound **17a** as yellow solid (265 mg, 95% yield, 98.85% purity). LCMS(m/z) for  $C_{33}H_{35}N_5O_4$  566.3(M+1).  $^1H$ -NMR (DMSO- $d_6$ , 400MHz,  $\delta$ ; ppm): 12.19 (s, 1H), 10.95 (s, 1H), 7.56 (d, 2H), 7.47 (d, 4H), 7.40 (s, 1H), 7.17 (d, 1H), 6.88 (d, 2H), 5.79 (d, 2H), 4.10 (d, 2H), 3.75 (s, 3H), 3.65 (m, 2H), 2.75 (m, 1H), 2.60 (dd, 1H), 2.39 (m, 8H), 2.17 (s, 3H), 1.82 (m, 1H).

**(S)-3-((4-(3-((4-methylpiperazine-1-yl)methyl)-2-oxopyrrolidin-1-yl)phenylamino)(phenyl)methylene)-2-oxoindoline-6-carboxylate and**

**(R)-3-((4-(3-((4-methylpiperazine-1-yl)methyl)-2-oxopyrrolidin-1-yl)phenylamino)(phenyl)methylene)-2-oxoindoline-6-carboxylate (compound 17b or 17c)**

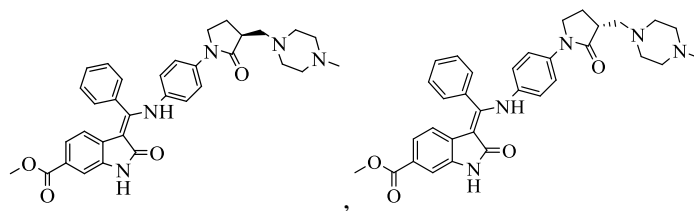

The compound **17a** was separated by chiral column (chiralpakia, 15 cm×0.46 mm, 5  $\mu$ M; eluent: LDCM/MeOH/DEA=98/2/0.1; flow rate: 1 ml/min;  $\lambda$ =214 nm; T=35°C):  $t_R$ =3.612 (**17b**, 99.81% purity);  $t_R$ =4.236 (**17c**, 98.98% purity). The resolution of **17b** and **17c** was 1.97.

**(Z)-N-methyl-2-(4-methylpiperazine-1-yl)-N-(4-((6-trifluoromethoxy)-2-oxoindoline-3-methylene)(phenyl)methylamino)phenyl)acetamide (Compound 2/b)**

**Step 1: N-(3-(trifluoromethoxy)phenyl)acetamide**

A solution of sodium sulfate (10.0 g) in 120 mL of water was stirred until all the solids were dissolved. A solution of 4-(trifluoromethoxy)aniline (7.0 g, 40 mmol) in 60 mL of 1N aqueous HCl and 12 mL of EtOH was added to the resulting aqueous solution. The mixture was stirred and chloral hydrate (7.2 g, 44 mmol) was added. The resulting mixture was used for the next step without further treatment.

**Step 2: (E)-2-(hydroxyimino)-N-(3-(trifluoromethoxy)phenyl)acetamide**

A solution of hydroxylamine hydrochloride (9.2 g, 132 mmol) in 40 mL of water was added to the above solution of N-(3-(trifluoromethoxy)phenyl)acetamide. The mixture was heated with stirring to a gentle reflux until the solids were dissolved, and heating was continued for an additional 15 min. The resultant was poured on to 600 g of ice, stirred, and the product was precipitated from solution, collected by suction filtration, washed with water and dried to give (E)-2-(hydroxyimino)-N-(3-(trifluoromethoxy)phenyl)acetamide as yellow solid (8.5 g, 86%).

**Step 3: 6-(trifluoromethoxy)indoline-2,3-dione**

(E)-2-(hydroxyimino)-N-(3-(trifluoromethoxy)phenyl)acetamide (8.5 g, 34 mmol) was slowly added to 80 mL of concentrated sulphuric acid at 100°C. The reaction mixture was heated for 1 h and the resultant solution was poured into 560 g of ice and water, stirred for 1 h and filtered. The solid was washed with water and dried to give 6-(trifluoromethoxy)indoline-2,3-dione as brown solid (3.0 g, 38%).

**Step 4: 6-(trifluoromethoxy)indolin-2-one (18b)**

A stirred solution of 6-(trifluoromethoxy)indoline-2,3-dione (3.0 g, 13.0 mmol) in of hydrazine hydrate(60 mL) was heated to 140°C for 4 h. The reaction mixture was cooled to room temperature, poured into 300 mL of ice water, and acidified to pH=2 with 6N hydrochloric acid. After standing at RT for 1 day the precipitate was collected by vacuum filtration, washed with water, and dried under vacuum to give 6-(trifluoromethoxy)indolin-2-one (1.1 g , 40%)

**Step 5: 1-acetyl-6-(trifluoromethoxy)indolin-2-one**

A solution of 6-(trifluoromethoxy)indolin-2-one (1.1 g, 5mol) in Acetic anhydride (20 mL) was stirred at 115°C for 8 h. After cooled to RT, the resulting mixture was concentrated. The residue was purified by column(EtOAc: Petroleum ether=0~1:3) to give the product 1-acetyl-6-(trifluoromethoxy)indolin-2-one as brown solid (1.0 g, 75%).

**Step 6: (E)-1-acetyl-3-(methoxy(phenyl)methylene)-6-(trifluoromethoxy)indolin-2-one**

A solution of 1-acetyl-6-(trifluoromethoxy)indolin-2-one (1.0 g, 3.9 mmol) in acetic anhydride (20 mL) was heated at 110°C. Trimethylorthobenzoate (2.1 g, 11.7 mmol) was then added dropwise over a period of 30 min. The mixture was stirred at 120°C for 13 h. After cooled to RT, the mixture was concentrated. The residue was purified by column (EtOAc: Petroleum ether=0~1:3) to give the product (E)-1-acetyl-3-(methoxy(phenyl)methylene)-6-(trifluoromethoxy)indolin-2-one as brown solid (800 mg, 54%).

**Step 7: (E)-3-(methoxy(phenyl)methylene)-6-(trifluoromethoxy)indolin-2-one (19b)**

To a suspension of (E)-1-acetyl-3-(methoxy(phenyl)methylene)-6-(trifluoromethoxy)indolin-2-one (800 mg, 2.1 mmol) in methanol (5 mL) was added KOH (40 mg, 0.7 mmol) in methanol (0.4 mL) dropwise at RT. The mixture was stirred at room temperature for 3 h and concentrated. The residue was then purified by column (EtOAc: Petroleum ether=0~1:2) to give (E)-3-(methoxy(phenyl)methylene)-6-(trifluoromethoxy)indolin-2-one as brown solid (650 mg, 91%).

**Step 8: (Z)-N-methyl-2-(4-methylpiperazine-1-)-N-(4-((6-trifluoromethoxy)-2-oxoindoline-3-methylene)(phenyl)methylamino)phenylacetamide (Compound 2Ib)**

To a solution of (Z)-3-(methoxyl(phenyl)methylene)-6-trifluoromethoxyindole-2-ketone (350 mg, 1.0 mmol) in methanol (20 mL) was added N-(4-aminophenyl)-N-methyl-2-(1-methylpiperazin-4-yl)acetamide (262 mg, 1.0 mmol). The reaction mixture was allowed to stir at 70°C for 13 h. The resulting solution was concentrated to give the crude product, which was then re-crystallized in ethyl acetate to give compound **2Ib** as pale yellow solid (400 mg, 71% yield, 98.74% purity). LCMS(m/z) for C<sub>30</sub>H<sub>30</sub>F<sub>3</sub>N<sub>5</sub>O<sub>3</sub> 565.2 (M+1). <sup>1</sup>H-NMR (DMSO-d<sub>6</sub>, 400MHz, δ; ppm): 11.98 (s, 1H), 10.94 (s, 1H), 7.57(m, 3H), 7.53 (m, 2H), 7.10 (d,

J=8.4Hz, 2H), 6.84 (d, J=8.4Hz, 2H), 6.78 (d, J=0.8Hz, 1H), 6.54(m,1H), 5.75(d, J=8.4Hz, 1H), 3.03 (brs, 3H), 2.65 (brs, 2H), 2.12-2.22 (m, 6H), 2.09(m, 5H).

**(Z)-N-methyl-2-(4-methylpiperazine-1-)-N-(4-(((6-(1,2,4-oxadiazole-5-)-2-oxoindoline-3-methylene)(phenyl)methylamino)phenyl)acetamide (Compound 21c)**

**Step 1: dimethyl 2-(4-cyano-2-nitrophenyl)malonate**

To a stirred solution of potassium tert-butoxide (85.92 g, 767.12 mmol) in NMP (500 mL), was added dimethyl malonate (101.26 g, 767.12 mmol) dropwise over a period of 30 min. The mixture was stirred for another 1 h and 4-chloro-3-nitrobenzonitrile (70.00 g, 383.56 mmol) was then added in portions over a period of 30 min. The mixture was stirred at 90°C for 1 h. After cooled to RT, the mixture was adjusted to pH=2 using 2N HCl, and filtered to give dimethyl 2-(4-cyano-2-nitrophenyl)malonate (90.2 g yield: 84.6%).

**Step 2: dimethyl 2-(4-carbamoyl-2-nitrophenyl)malonate**

A mixture of compound dimethyl 2-(4-cyano-2-nitrophenyl)malonate (20 g, 71.94 mmol) in concentrated sulfuric acid (50 mL) was stirred for 16 h. After the reaction completed, the mixture was poured into 500 mL cooled water and extracted with DCM, washed with water for twice with dried anhydrous Na<sub>2</sub>SO<sub>4</sub>, evaporated in vacuum to give dimethyl 2-(4-carbamoyl-2-nitrophenyl)malonate (21 g, 98.6%).

**Step 3: (Z)-dimethyl 2-(4-((dimethylamino)methylenecarbamoyl)-2-nitrophenyl)malonate**

A mixture of compound dimethyl 2-(4-carbamoyl-2-nitrophenyl)malonate (20 g, 67.56 mmol) in DMF-DMA (20 mL) was refluxed for 4 h, and cooled down to 0°C. Afterwards, the mixture was filtered to give (Z)-dimethyl 2-(4-((dimethylamino)methylenecarbamoyl)-2-nitrophenyl)malonate (19.1 g, 80.54%).

**Step 4: dimethyl 2-(2-nitro-4-(1,2,4-oxadiazol-5-yl)phenyl)malonate**

To a solution of hydroxylamine hydrochloride (2.45 g, 35.41 mmol) in a mixture of aqueous 5N sodium hydroxide solution (6.9 mL, 34.5 mmol), acetic acid (69 mL) and dioxane (59 mL) was added the compound (Z)-dimethyl 2-(4-((dimethylamino)methylenecarbamoyl)-2-nitrophenyl)malonate

(10 g, 29.51 mmol). The reaction was stirred at 90°C for 2 h. Upon cooling to RT, the solvent was removed under vacuum and the residue was purified by column chromatography eluting with 20% ethyl acetate/hexanes to give dimethyl 2-(2-nitro-4-(1,2,4-oxadiazol-5-yl)phenyl)malonate (2 g, 21.2%).

**Step 5: Dimethyl 2-(2-amino-4-(1,2,4-oxadiazol-5-yl)phenyl)malonate**

A mixture of dimethyl 2-(2-nitro-4-(1,2,4-oxadiazol-5-yl)phenyl)malonate (2 g, 6.23 mmol) and  $\text{SnCl}_2 \cdot 2\text{H}_2\text{O}$  (4 g, 18.65 mmol) in ethyl acetate was stirred for 17 h, then washed with water (250 mL), dried with anhydrous  $\text{Na}_2\text{SO}_4$ , evaporated to give dimethyl 2-(2-amino-4-(1,2,4-oxadiazol-5-yl)phenyl)malonate for the next step without purification.

**Step 6: 6-(1, 2, 4-oxadiazol-5-yl)indolin-2-one (18c)**

Dimethyl 2-(2-amino-4-(1,2,4-oxadiazol-5-yl)phenyl)malonate from the last step in acetic acid was allowed to react at 95°C for 2 h. Upon cooling to RT, the mixture was filtered to give 6-(1, 2, 4-oxadiazol-5-yl)indolin-2-one (0.45 g, 35.6%).

**Step 7: 1-acetyl-6-(1, 2, 4-oxadiazol-5-yl)indolin-2-one**

A mixture of compound 6-(1,2,4-oxadiazol-5-yl)indolin-2-one (0.45 g, 2.23 mmol) in acetic anhydride (10 mL) was allowed to react for 4 h, then cooled down to RT for the next step.

**Step 8: (Z)-1-acetyl-3-(methoxy(phenyl)methylene)-6-(1,2,4-oxadiazol-5-yl)indolin-2-one (19c)**

To a solution of the last step was added methyl orthobenzoate (0.608 mg, 3.345 mmol) dropwise. Afterwards, the mixture was allowed to react at 90°C for 2 h. The solution was cooled down to RT and filtered to give (Z)-1-acetyl-3-(methoxy(phenyl)methylene)-6-(1,2,4-oxadiazol-5-yl)indolin-2-one (0.3 g, 37.3 %)

**Step 9:**

**(Z)-N-(4-(((1-acetyl-6-(1,2,4-oxadiazol-5-yl)-2-oxoindolin-3-ylidene)(phenyl)methylamino)phenyl)-N-methyl-2-(4-methylpiperazin-1-yl)acetamide**

A mixture of compound of (Z)-1-acetyl-3-(methoxy(phenyl)methylene)-6-(1,2,4-oxadiazol-5-yl)indolin-2-one (0.30 g, 0.83 mmol) and compound **20** (0.26 g, 0.996 mmol) in MeOH (10 mL) was refluxed at 70°C for 2 hrs. The mixture

was cooled down to RT for the next step.

**Step 10:**

**(Z)-N-methyl-2-(4-methylpiperazine-1-yl)-N-(4-(((6-(1,2,4-oxadiazole-5-yl)-2-oxoindoline-3-methylene)(phenyl)methylamino)phenyl)acetamide (Compound 21c)**

To the reaction mixture was added KOH (15.5 mg, 0.28 mmol) slowly. The mixture was allowed to stir for 3 h. The resulting solution was concentrated to give the crude product, which was then purified by silica gel column (eluent: DCM/MeOH=10:1) to give **21c** as yellow solid (80 mg, 17.6% yield, 83.45% purity). LCMS (m/z) for  $C_{31}H_{31}N_7O_3$  549.2 (M+1).  $^1H$ -NMR (DMSO- $d_6$ , 400 MHz,  $\delta$ ; ppm): 12.23 (s, 1H), 8.91 (brs, 1H), 8.41 (s, 1H), 7.71 (s, 1H), 7.55-7.59 (m, 3H), 7.41-7.49 (m, 3H), 6.97 (d, 2H), 6.82 (d, 2H), 6.08 (d, 1H), 3.12 (s, 3H), 2.84 (s, 2H), 2.57-2.64 (m, 8H), 2.42 (s, 3H).

**(Z)-N-methyl-2-(4-methylpiperazine-1-yl)-N-(4-(((6-(1,2,4-oxadiazole-3-yl)-2-oxoindoline-3-methylene)(phenyl)methylamino)phenyl)acetamide (Compound 21d)**

**Step 1: (Z)-dimethyl 2-(4-(N'-hydroxycarbamimidoyl)-2-nitrophenyl)malonate**

A mixture of dimethyl 2-(4-cyano-2-nitrophenyl)malonate (5.0 g, 18 mmol), hydroxylamine hydrochloride (2.48 g, 36 mmol) and  $Na_2CO_3$  (9.5 g, 90 mmol) in EtOH (150 mL) was stirred at 70°C for 5 h in a sealed tube. After cooled to RT, the mixture was filtered. The filtrate was concentrated to give (Z)-dimethyl 2-(4-(N'-hydroxycarbamimidoyl)-2-nitrophenyl)malonate as orange solid (5.6 g, 100%).

**Step 2: dimethyl 2-(2-nitro-4-(1,2,4-oxadiazol-3-yl)phenyl)malonate**

To a stirred mixture of (Z)-dimethyl 2-(4-(N'-hydroxycarbamimidoyl)-2-nitrophenyl)malonate (5.6 g, 18 mmol) and trimethylorthoformate (7.6 g, 72 mmol) in THF (150 mL) was added  $BF_3 \cdot Et_2O$  (3.1 mL, 21.6 mmol) dropwise at 0°C. Then, the mixture was stirred at 30°C overnight. The resulting mixture was concentrated. The residue was purified by column (EtOAc/PE=0~1/5) to give dimethyl 2-(2-nitro-4-(1,2,4-oxadiazol-3-yl)phenyl)malonate as yellow oil (1.5 g, 26%).

**Step 3: methyl 2-(2-amino-4-(1,2,4-oxadiazol-3-yl)phenyl)acetate**

To a solution of dimethyl 2-(2-nitro-4-(1,2,4-oxadiazol-3-yl)phenyl)malonate (1.5 g, 4.7 mmol) in

EtOAc (200 mL) was added  $\text{SnCl}_2 \cdot 2\text{H}_2\text{O}$  (5.3 g, 23.4 mmol). The reaction was stirred at RT for 48 h. The resulting solution was neutralized with saturated  $\text{NaHCO}_3$ . The resulting mixture was diluted with water (200 mL), filtered and extracted with EtOAc (200 mL  $\times$  3). The combined organic layers were washed with brine (200 mL), dried ( $\text{Na}_2\text{SO}_4$ ) and concentrated to give methyl 2-(2-amino-4-(1, 2, 4-oxadiazol-3-yl)phenyl)acetate as yellow oil (1.0 g, 91%).

**Step 4: 6-(1, 2, 4-oxadiazol-3-yl)indolin-2-one (18d)**

A solution of methyl 2-(2-amino-4-(1, 2, 4-oxadiazol-3-yl)phenyl)acetate (1.0 g, 4.3 mmol) in acetic acid (20 mL) was stirred at 90°C for 1 h. After cooled to RT, the solution was concentrated. The residue was purified by column (EtOAc/PE=0~1/2) to give compound 6-(1, 2, 4-oxadiazol-3-yl)indolin-2-one as pale-white (700 mg, 61%).

**Step 5: 1-acetyl-6-(1, 2, 4-oxadiazol-3-yl)indolin-2-one**

A solution of 6-(1,2,4-oxadiazol-3-yl)indolin-2-one (700 mg, 3.5 mmol) in acetic anhydride (20 mL) was stirred at 110°C for 2 h. After cooled to RT, the solution was concentrated to give 1-acetyl-6-(1,2,4-oxadiazol-3-yl)indolin-2-one as brown solid (850 mg, 100%).

**Step 6: (E)-1-acetyl-3-(methoxy(phenyl)methylene)-6-(1,2,4-oxadiazol-3-yl)indolin-2-one**

A suspension of 1-acetyl-6-(1,2,4-oxadiazol-3-yl)indolin-2-one (850 mg, 3.5 mmol) in acetic anhydride (50 mL) was heated to 110°C. Then, trimethylorthobenzoate (1.9 g, 10.5 mmol) was added dropwise over a period of 30 min. The mixture was stirred at 120°C for 13 h. After cooled to RT, the mixture was concentrated. The residue was purified by column (EtOAc/PE=0~1/4) to give (E)-1-acetyl-3-(methoxy(phenyl)methylene)-6-(1,2,4-oxadiazol-3-yl)indolin-2-one as brown solid (600 mg, 47%).

**Step 7: (E)-3-(methoxy(phenyl)methylene)-6-(1,2,4-oxadiazol-3-yl)indolin-2-one (19d)**

To a solution of (E)-1-acetyl-3-(methoxy(phenyl)methylene)-6-(1,2,4-oxadiazol-3-yl)indolin-2-one (600 mg, 1.66 mmol) in methanol (10 mL) was added KOH (31 mg, 0.55 mmol) in methanol (0.31 mL) dropwise at RT. The mixture was stirred at RT for 2 h and then concentrated. The residue was purified by column (EtOAc/PE=0~1/2) to give (E)-3-(methoxy(phenyl)methylene)-6-(1,2,4-oxadiazol-3-yl)indolin-2-one as yellow solid (200 mg,

38%).

**Step 8:**

**(Z)-N-methyl-2-(4-methylpiperazine-1-yl)-N-(4-((6-(1,2,4-oxadiazole-3-yl)-2-oxoindoline-3-methylene)(phenyl)methylamino)phenyl)acetamide (Compound 21d)**

To a solution of (E)-3-(methoxy(phenyl)methylene)-6-(1,2,4-oxadiazol-3-yl)indolin-2-one (200 mg, 0.62 mmol) in methanol (20 mL) was added N-(4-aminophenyl)-N-methyl-2-(4-methylpiperazin-1-yl)acetamide (160 mg, 0.61 mmol). The reaction mixture was allowed to stir for 13 h at 70°C. The resulting solution was cooled to RT and concentrated under reduce pressure to give the crude product. The residue was purified by silica gel column (eluent: EtOAc:PE=0~80:100) to give **21d** as yellow solid (90 mg, 26% yield, 99.27% purity). LCMS(m/z) for  $C_{31}H_{31}N_7O_3$  549.2 (M+1).  $^1H$ -NMR (DMSO- $d_6$ , 400MHz,  $\delta$ ; ppm): 12.20(s, 1H), 11.10 (s, 1H), 7.40-7.65(m, 6H), 7.10-7.18 (m, 3H), 6.98 (d, 1H), 6.89 (d, 2H), 5.78 (d, 1H), 3.04(s, 3H), 2.66(s, 2H), 2.08-2.16(m, 11H).

**(Z)-N-methyl-N-(4-((6-(2-methyl-2H-tetrazol-5-yl)-2-oxoindolin-3-ylidene)(phenyl)methylamino)phenyl)-2-(4-methylpiperazin-1-yl)acetamide (Compound 21e) and its chloride**

**Step 1: Dimethyl 2-(4-cyano-2-nitrophenyl)malonate**

To a stirred solution of potassium tert-butoxide (85.92 g, 767.12 mmol) in NMP (500 mL) was added dimethyl malonate (101.26 g, 767.12 mmol) dropwise over a period of 30 min. The mixture was stirred for another 1 h and 4-chloro-3-nitrobenzonitrile (70.00 g, 383.56 mmol) was added in portions over a period of 30 min. The mixture was stirred at 90°C for 1 h. After cooled to RT, the mixture was adjusted to pH=2 using 2N HCl, and filtered to give dimethyl 2-(4-cyano-2-nitrophenyl)malonate (90.2 g, 84.6%).

**Step 2: methyl 2-(4-cyano-2-nitrophenyl)acetate**

A mixture of compound dimethyl 2-(4-cyano-2-nitrophenyl)malonate (70 g, 251.7 mmol) and LiCl (21.15 g, 503.4 mmol) was stirred at 90°C for 4 h. Afterwards, the mixture was cooled down to RT, extracted with DCM and then washed with water for 2 times. The organic layer was dried with

anhydrous Na<sub>2</sub>SO<sub>4</sub>, evaporated in vacuum to give methyl 2-(4-cyano-2-nitrophenyl)acetate (50.0 g, 90%)

**Step 3: methyl 2-(2-amino-4-cyanophenyl)acetate**

A mixture of compound methyl 2-(4-cyano-2-nitrophenyl)acetate (50 g, 227 mmol) and Pd/C (2 g) in THF was stirred under H<sub>2</sub> atmosphere for 38 h. Afterwards, the mixture was filtered and then the solvent was evaporated in vacuum to give methyl 2-(2-amino-4-cyanophenyl)acetate (30.2 g 70%).

**Step 4: 2-oxoindoline-6-carbonitrile**

A mixture of methyl 2-(2-amino-4-cyanophenyl)acetate (30g, 157.89 mmol) in acetic acid was stirred at 95°C for 2 h. Upon cooling to RT, the mixture was filtered to give 2-oxoindoline-6-carbonitrile (22.2 g, 89%)

**Step 5: 1-acetyl-2-oxoindoline-6-carbonitrile**

A mixture of 2-oxoindoline-6-carbonitrile (4 g, 25.31 mmol) in acetic anhydride (10 mL) was stirred for 4 h. The mixture was then cooled down to RT and filtered to give 1-acetyl-2-oxoindoline-6-carbonitrile (2 g, 39.5%).

**Step 6: (Z)-1-acetyl-3-(methoxy(phenyl)methylene)-2-oxoindoline-6-carbonitrile**

To a solution of 1-acetyl-2-oxoindoline-6-carbonitrile (2 g, 10 mmol) was added methyl orthobenzoate (2.73g, 15 mmol) dropwise. The mixture was allowed to react at 90°C for 2 h. The solution was cooled down to RT and then filtered to give (Z)-1-acetyl-3-(methoxy(phenyl)methylene)-2-oxoindoline-6-carbonitrile (2g , 62.9%).

**Step 7:**

**(Z)-N-(4-(((1-acetyl-6-cyano-2-oxoindolin-3-ylidene)(phenyl)methylamino)phenyl)-N-methyl-2-(4-methylpiperazin-1-yl)acetamide**

A mixture (Z)-1-acetyl-3-(methoxy(phenyl)methylene)-2-oxoindoline-6-carbonitrile (1 g, 3.14 mmol) and compound **20** (0.998 g, 3.77 mmol) in MeOH (10 mL) was refluxed at 70°C for 2 h. The mixture was cooled down to RT for the next step.

**Step 8:**

**(Z)-N-(4-(((6-cyano-2-oxoindolin-3-ylidene)(phenyl)methylamino)phenyl)-N-methyl-2-(4-methylpiperazin-1-yl)acetamide**

To the mixture of the last solution was added KOH (0.057 g, 1.03 mmol). Afterwards, the mixture was allowed to react for 3 h, filtered to give (Z)-N-(4-((6-cyano-2-oxoindolin-3-ylidene)(phenyl)methylamino)phenyl)-N-methyl-2-(4-methylpiperazin-1-yl)acetamide (1.2 g, 75.5%).

**Step 9:**

**(Z)-N-methyl-2-(4-methylpiperazin-1-yl)-N-(4-((2-oxo-6-(2H-tetrazol-5-yl)indolin-3-ylidene)(phenyl)methylamino)phenyl)acetamide**

A mixture of (Z)-N-(4-((6-cyano-2-oxoindolin-3-ylidene)(phenyl)methylamino)phenyl)-N-methyl-2-(4-methylpiperazin-1-yl)acetamide (1 g, 1.96 mmol) and azidotributyltin (3.25 g, 9.8 mmol) in methylbenzene (40 mL) was allowed to stir at 150°C for 2 h. The resulting mixture was cooled down to RT and filtered to give (Z)-N-methyl-2-(4-methylpiperazin-1-yl)-N-(4-((2-oxo-6-(2H-tetrazol-5-yl)indolin-3-ylidene)(phenyl)methylamino)phenyl)acetamide (0.8 g, 74.3 %)

**Step 10:**

**(Z)-N-methyl-N-(4-((6-(2-methyl-2H-tetrazol-5-yl)-2-oxoindolin-3-ylidene)(phenyl)methylamino)phenyl)-2-(4-methylpiperazin-1-yl)acetamide (Compound 2Ie) and its chloride**

To a solution of (Z)-N-methyl-2-(4-methylpiperazin-1-yl)-N-(4-((2-oxo-6-(2H-tetrazol-5-yl)indolin-3-ylidene)(phenyl)methylamino)phenyl)acetamide (276 mg, 0.77 mmol) in methanol (20 mL) at 40°C was added KOH (21.5 mg, 0.38 mmol in 5 mL methanol) slowly with stirring for 0.5 h, followed by cooled to RT. N-(4-aminophenyl)-N-methyl-2-(1-methylpiperidin-4-yl)acetamide (200 mg, 0.76 mmol) was then added to the reaction mixture, which was allowed to stir at 70°C for 10 h. The mixture was cooled to RT, concentrated under reduced pressure. The residue was purified by silica gel column (eluent: DCM/methanol =60:1) to give **2Ie** as yellow solid. The obtained product was dissolved in 20 mL methanol, then 2 drops of concentrated hydrochloric acid and DCM (2 mL) were added into the reaction mixture respectively. The mixture was allowed to stir at RT for 1 h. Then the solvent was removed under reduced pressure to give its chloride as yellow solid (100 mg, 24% yield, 98.11%

purity). LCMS (m/z) for  $C_{32}H_{32}N_6O_3$  548 (M+1).  $^1H$ -NMR ( $C_{32}H_{32}N_6O_3 \cdot HCl$ , DMSO- $d_6$ , 400MHz,  $\delta$ ; ppm): 12.20 (s, 1H), 11.10 (s, 1H), 7.40-7.65(m, 6H), 7.10-7.18 (m, 3H), 6.98 (d, 1H), 6.89 (d, 2H), 5.78 (d,1H), 3.04 (s, 3H), 2.66 (s, 2H), 2.08-2.16 (m, 11H).

**( (Z)-N-methyl-2-(4-methylpiperazin-1-yl)-N-(4-(((6-(oxazol-5-yl)-2-oxoindolin-3-ylidene)(phenyl)methylamino)phenyl)acetamide (Compound 2/f)**

**Step 1: p-aminobenzamide**

4-nitrophenylimidate (4 g, 26.29 mmol) was allowed to be reduced under  $H_2$  atmosphere, resulting in p-aminobenzamide (2.5g , 78%).

**Step 2: Tert-butyl (4-methylaminophenyl)amidemethylformate**

To a solution of p-aminobenzamide (2.5 g, 20.46 mmol) in THF (50 mL) was added  $K_2CO_3$  (5.66 g, 40.93 mmol) and  $Boc_2O$  (4.47 g, 20.46 mmol). The mixture was allowed to react at RT for 2 h. The resulting mixture was concentrated and then purified by column to give tert-butyl (4-methylaminophenyl)amidemethylformate (2 g, 44%).

**Step 3: Tert-butyl 4-(N-methyl-2-(4-methylpiperazin-1-yl)acetamido)phenylcarbamate**

To a solution of tert-butyl (4-Methylaminophenyl)amidemethylformate (1 g, 4.5 mmol) in THF (20 mL) was added 2-(4-methylpiperazin-1-yl)acetic acid (707 mg, 4.5 mmol), HATU (2.56 g, 6.75 mmol) and  $K_2CO_3$  (1.24 g, 9 mmol). The reaction mixture was allowed to stir at 70 °C for 4 hr. The organic solvent was then evaporated and the product was purified by column to give compound tert-butyl 4-(N-methyl-2-(4-methylpiperazin-1-yl)acetamido)phenylcarbamate (700 mg, 43%).

**Step 4: N-(4-aminophenyl)-N-methyl-2-(1-methylpiperazin-4-yl)acetamide**

Tert-butyl(4-(N-methy-2(1-Methylpiperazin-4-yl)acetamido)phenyl)amidemethylformat-e (700 mg, 1.9 mmol) was allowed to react in TFA (10 mL) at 60°C for 2 h. The solvent was removed under

vacuum to give N-(4-aminophenyl)-N-methyl-2-(1-methylpiperazin-4-yl)acetamide (400 mg, 79%).

**Step 5:**

**(Z)-N-methyl-2-(4-methylpiperazin-1-yl)-N-(4-(((6-(oxazol-5-yl)-2-oxoindolin-3-ylidene)(phenyl)methylamino)phenyl)acetamide (Compound 2If)**

To a solution of (Z)-1-acetyl-3-(methoxy(phenyl)methylene)-6-(oxazol-5-yl)indolin-2-one (280 mg, 0.78 mmol) in methanol (5 mL) at 40°C was added KOH (22 mg, 0.4 mmol in 5 mL methanol) slowly with stir for 0.5 h, followed by cooled to RT. 1-(2-(4-methylpiperazin-1-yl)acetyl)-4-aminopiperazin (210 mg, 0.8 mmol) was then added to the reaction mixture, which was allowed to stir at 50°C for 3 h. The resulting mixture was concentrated under reduce pressure. The residue was purified by silica gel column (eluent: DCM/methanol =60:1) to give **2If** as yellow solid (57 mg, 13% yield, 92.84% purity). LCMS (m/z) for C<sub>32</sub>H<sub>32</sub>N<sub>6</sub>O<sub>3</sub> 548.2 (M+1). <sup>1</sup>H-NMR (DMSO-d<sub>6</sub>, 400MHz, δ; ppm): 2.25(s, 3H), 2.42~2.47(m, 8H), 2.79 (s, 2H), 3.18 (s, 3H), 6.02 (d, 1H), 6.78(d, 2H), 6.98 (t, 3H), 7.20(d, 2H), 7.46(d, 2H), 7.52~7.59(m, 3H), 7.76(s, 1H), 7.86(s, 1H), 12.01(s, 1H).

**(Z)-N-methyl-2-(4-methylpiperazin-1-yl)-N-(4-(((6-(furan-2-yl)-2-oxoindoline-3-methylene)(phenyl)methylamino)phenyl)acetamidinehydrochloride (Compound 2Ig)**

**Step 1: Intermediate 2Ia**

**2Ia** was prepared according to the previously published approach <sup>1</sup>(as described in Scheme 3).

**Step 2: Intermediate 22**

To a 50 mL round-bottomed flask were added (Z)-N-(4-(((6-bromo-2-oxoindolin-3-ylidene)(phenyl)methylamino)phenyl)-N-methyl-2-(4-methylpiperazin-1-yl)acetamide (3.0 g, 5.3 mmol), bis(pinacolato)diboron (1.43 g, 5.6 mmol), KOAc (553 mg, 5.6 mmol), PdCl<sub>2</sub>(dppf) (300 mg, 10%) and dioxane (16 mL). The mixture was stirred for 6 h at 100°C under N<sub>2</sub> protection. The mixture was cooled to RT and then filtered. The filtrate was concentrated to dryness under reduce pressure. The solid was washed with methanol to give **22** as yellow solid (3.0 g, 92%).

**Step 3:**

**(Z)-N-methyl-2-(4-methylpiperazin-1-yl)-N-(4-((6-(furan-2-yl)-2-oxoindoline-3-methylene)(phenyl)methylamino)phenyl)acetamidinehydrochloride (Compound 2Ig)**

To a solution of (Z)-N-methyl-N-(4-((6-borate-2-oxoindoline-3-ylmethylene)(phenyl)methylamino)(phenyl)-2-(4-methylpiperazin-1-yl)acetamide (1216 mg, 2 mmol) in dioxane (16 mL) was added water (1 mL), 2-bromofuran (900 mg, 6 mmol), Cs<sub>2</sub>CO<sub>3</sub> (1960 mg, 6 mmol) and PdCl<sub>2</sub>(dppf) (120 mg, 10%). The reaction mixture was allowed to stir at 100°C for 6h, and filtrated, concentrated to give the crude product. The residue was purified by silica gel column (eluent: DCM/MeOH=50:1) to give **2Ih** as yellow solid (150 mg, 13.5% yield, purity 93.78%). The resulting product was dissolved in the mixture of 12 mL DCM and 2 mLmethanol and then 0.2 mL concentrated hydrochloric acid were added slowly. The above mixture was allowed to stir for 0.5 h. The resulting solution was then concentrated to give its chloride as yellow solid. LCMS (m/z) for C<sub>33</sub>H<sub>33</sub>N<sub>5</sub>O<sub>3</sub>·HCl 584.1 (M+1). <sup>1</sup>H-NMR (C<sub>33</sub>H<sub>33</sub>N<sub>5</sub>O<sub>3</sub>·HCl, DMSO-d<sub>6</sub>, 400MHz, δ; ppm): 2.74 (s, 3H), 3.09(m, 4H),3.15(m, 4H), 3.10(s, 2H), 3.48(s, 3H), 5.77(d, 1H), 6.51(d, 1H), 6.73(d, 1H), 6.83(m, 2H),6.93(d, 1H), 7.15(m, 3H), 7.54(d, 2H),7.62(m, 4H),10.88(s, 1H),12.06(s, 1H).

**(Z)-N-methyl-2-(4-methylpiperazin-1-yl)-N-(4-((6-(4H-1,2,4-triazole-3-yl)-2-oxoindoline-3-ylmethylene)(phenyl)methylamino)phenyl)acetamidinehydrochloride (Compound 2Ih)**

**Step 1: 3-chlorine-4-(4-methoxybenzyl)-4H-1,2,4-triazole**

To a solution of 3-chlorine-4H-1,2,4-triazole (3 g, 29 mmol) and K<sub>2</sub>CO<sub>3</sub> (5.25 g, 38 mmol) in DMF (30 mL) was added 4-bromomethylanisole (8.74 g, 44 mmol) slowly. The reaction mixture was allowed to stir at RT for 6 h, then filtrated and concentrated to give the crude product. The residue was then purified by silica gel column (eluent: DCM/MeOH=50:1) to give 3-chlorine-4-(4-methoxybenzyl)-4H-1,2,4-triazoleas white solid (5 g, 76.9%).

**Step 2:**

**(Z)-N-methyl-2-(4-methylpiperazin-1-yl)-N-(4-((6-(4-(4-methoxybenzyl)-4H-1,2,4-triazole-3-yl)-2-oxoindoline-3-ylmethylene)(phenyl)methylamino)phenyl) acetamidine**

To a solution of (Z)-N-methyl-N-(4-(((6-borate-2-oxoindoline-3-ylmethylene)(phenyl)methylamino)(phenyl)-2-(4-methylpiperazin-1-yl)acetamide (**22**, 608 mg, 1 mmol) in dioxane (16 mL) was added water (1 mL), 3-chlorine-4-(4-methoxybenzyl)-4*H*-1,2,4-triazole (669 mg, 3 mmol), Cs<sub>2</sub>CO<sub>3</sub> (980 mg, 3 mmol) and PdCl<sub>2</sub>(dppf) (60 mg, 10%). The reaction mixture was allowed to stir at 100 °C for 6 h. Then the mixture was filtrated and concentrated to give the crude product. The residue was purified by silica gel column (eluent: DCM/MeOH=50:1) to give (Z)-N-methyl-2-(4-methylpiperazin-1-yl)-N-(4-(((6-(4-(4-methoxybenzyl)-4*H*-1,2,4-triazole-3-yl)-2-oxoindoline-3-ylmethylene)(phenyl)methylamino)phenyl) acetamidine as yellow solid (200 mg, 30%).

### Step 3:

#### **(Z)-N-methyl-2-(4-methylpiperazin-1-yl)-N-(4-(((6-(4*H*-1,2,4-triazole-3-yl)-2-oxoindoline-3-ylmethylene)(phenyl)methylamino)phenyl)acetamidinehydrochloride (Compound 21h)**

(Z)-N-methyl-2-(4-methylpiperazin-1-yl)-N-(4-(((6-(4-(4-methoxybenzyl)-4*H*-1,2,4-triazole-3-yl)-2-oxoindoline-3-ylmethylene)(phenyl)methylamino)phenyl) acetamidine was dissolved in TFA (10 mL). The resulting solution was heated in a microwave at 110°C for 0.5 h, then cooled to RT and concentrated to give the crude product. The residue was purified by silica gel column (eluent: DCM:MeOH:Et<sub>3</sub>N=10:1:0.05) to give (Z)-N-methyl-2-(4-methylpiperazin-1-yl)-N-(4-(((6-(4-(4-methoxybenzyl)-4*H*-1,2,4-triazole-3-yl)-2-oxoindoline-3-ylmethylene)(phenyl)methylamino)phenyl) acetamidine as yellow solid (120 mg, 35.8% yield, purity 95.45%). Its chloride was prepared in the same manner as described for **21 h** chloride. LCMS (m/z) for C<sub>31</sub>H<sub>32</sub>N<sub>8</sub>O<sub>2</sub> 549.3 (M+1). <sup>1</sup>H-NMR (DMSO-d<sub>6</sub>, 400MHz, δ; ppm): 2.74 (s, 3H), 3.09(m, 4H), 3.15(m, 4H), 3.35(s, 2H), 3.60(s, 3H), 5.83(d, 1H), 6.85(d, 2H), 7.20(d, 2H), 7.31(d, 1H), 7.65(m, 7H), 8.64(s, 1H), 11.08(s, 1H), 12.22(s, 2H).

## **Assay protocols for in vitro activity and PK profiles**

### ***In vitro* kinase activity assays**

The kinase inhibitory activities of KBP-7018 against 64 purified recombinant protein tyrosine kinases were examined by using an Off-Chip Mobility Shift Assay (MSA, Shanghai ChemPartner Co., Ltd, China) and an Kinase-Glo Luminescent Assay (for PI3Ka and PI3K $\delta$  assay only, Shanghai ChemPartner Co., Ltd, China) followed manufactory's protocols. Briefly, each test compound was mixed with enzyme, substrate, ATP, and Mg under appropriate buffer conditions for the MSA or ELISA. The readout value of the reaction control (complete reaction mixture) was set as 0% inhibition, and the readout value of the background (Enzyme (-)) was set as 100% inhibition; the percent inhibition of each test solution was then calculated. IC<sub>50</sub> values (the half maximal inhibitory concentration) were calculated from concentrations versus % inhibition curves.

### ***In vitro* cellular activity assays**

NIH3T3 cells (from ATCC) were cultured in Dulbecco's modified Eagle's medium (DMEM) with L-glutamine supplemented with 10% calf serum (Gibco Lot# 8155322) and 100 units/ml penicillin, 100  $\mu$ g/ml streptomycin. For activity assay, 3T3 cells were seeded plated into a 96-well plate (5000 cells/well) and allowed to attach overnight before being serum starved (0.5% calf serum, 24 h). Cells were then exposed to stimuli of recombinant human PDGF-BB (SBH Sciences Internal Standard) in the presence and absence of investigated compounds (0.002, 0.005, 0.014, 0.041, 0.123, 0.370, 1.111, 3.333 and 10  $\mu$ M) for 42 hours before cell proliferation assay by Promega's Substrate Cell Titer 96 Aqueous One Solution (SBH Sciences).

### ***In vivo* animal model and experimental treatments**

Adult C57 male mouse were purchased from Beijing Vital River Laboratories, Inc. This study was approved by the Association of Laboratory Animal Sciences and the Center for Laboratory Animal Science at Institute of Materia Medica Chinese Academy of Medical Sciences & Peking Union Medical College. All procedures on animals followed the guidelines for human treatment set by the Association of Laboratory Animal Sciences and the Center for Laboratory Animal Science at Institute of Materia Medica Chinese Academy of Medical Sciences & Peking Union Medical College.

For the induction of pulmonary fibrosis, mice were intratracheally injected with bleomycin (BLM, Nippon Kayaku, 5.0 mg/kg in 50  $\mu$ L saline). To investigate the effects of compound 3 on BLM-induced pulmonary fibrosis, mice were grouped and lavage with KBP 7018 (10, 30 or 100 mg/kg) daily from day 0 to day 28. Thus, mice received a lavage saline and nintedanib (30 or 100 mg/kg) daily as a negative control and positive control. During the period of 28 days, the survival rate of each group was recorded.

### **Pharmacokinetics**

The studies involving the CD-1 mice, SD male rats and beagle dogs were purchased from Beijing Vital River (mice and rats, China) and Marshall BioResource Inc. (dogs, Beijing, China) respectively. All the protocols were in accordance with the guidelines for laboratory animal care and use of KBP Biosciences Co. Ltd. The animals were single administered intravenously dosing at 10.0, 2.0 and 2.0 mg/kg of KBP 7018 for mice, rats and dogs respectively. To evaluate the oral bioavailability of molecules in above animal models, KBP 7018 was single administered orally by gavage at the dose of 50.0, 10.0 and 20.0 mg/kg for mice, rats and dogs respectively accordingly. The blood samples were taken at pre-determination time and the plasma were separated. The concentration of KBP 7018 in plasma was determined by UFLC-MS/MS (HPLC system: ShimadzuUFLC) after the samples preparations by proteins precipitation. Pharmacokinetics parameters were calculated by WinNolin 6.3.

### **References**

1. Treu, M. K., Thomas; Reiser Ulrich, WO2010/012747A1 2010.

Table S1. The abbreviations of 64 kinases tested in a kinase panel.

| Abbreviation  |                                                                                     |                |                                                             |
|---------------|-------------------------------------------------------------------------------------|----------------|-------------------------------------------------------------|
| ABL           | Abl Protein Tyrosine Kinase                                                         | HER2           | human epidermal growth factor receptor 2                    |
| AKT1          | AKT serine/threonine kinase 1                                                       | HER4           | human epidermal growth factor receptor 4                    |
| ALK           | anaplastic lymphoma receptor tyrosine kinase                                        | IGF1R          | insulin-like growth factor 1 receptor                       |
| AMPKa1        | AMP-activated protein kinase subunit a1                                             | IKK $\beta$    | inhibitor of kappa B kinase beta                            |
| AURA          | Aurora kinase A                                                                     | INSR           | Insulin receptor tyrosine kinase                            |
| AURB          | Aurora kinase B                                                                     | IRAK1          | interleukin receptor associated kinase 1                    |
| BLK           | B lymphocyte kinase                                                                 | IRAK4          | interleukin receptor associated kinase 2                    |
| BRAF          | VRAF murine sarcoma viral oncogene homologue B1 kinase                              | ITK            | IL2-inducible T-cell kinase                                 |
| BRK           | breast tumor kinase                                                                 | JAK1           | Janus kinase 1                                              |
| BTK           | Bruton's tyrosine kinase                                                            | JAK2           | Janus kinase 2                                              |
| CDK2          | cyclin-dependent kinase 2                                                           | JAK3           | Janus kinase 3                                              |
| CHK1          | checkpoint kinase 1                                                                 | JNK2           | c-Jun N-terminal kinase 2                                   |
| CK1d          | casein kinase 1 delta                                                               | JNK3           | c-Jun N-terminal kinase 3                                   |
| CSK           | C-terminal Src kinase                                                               | c-KIT          | c-Kit proto-oncogene encoded protein tyrosine kinase        |
| DYRK1a        | dual-specificity tyrosine phosphorylation-regulated kinase 1a                       | LCK            | lymphocyte-specific protein tyrosine kinase                 |
| EGFR          | epidermal growth factor receptor                                                    | LYNa           | LYN encoded protein tyrosine kinase a                       |
| EGFR (T790M)  | epidermal growth factor receptor (T790M)                                            | MAPKAPK2       | mitogen-activated protein kinase-activated protein kinase 2 |
| ERK2          | extracellular signal-regulated kinase 2                                             | MAPKAPK5       | mitogen-activated protein kinase-activated protein kinase 5 |
| FER           | Fer protein tyrosine kinase                                                         | c-MET          | MET proto-oncogene encoded protein kinase                   |
| FGR           | Fgr protein tyrosine kinase                                                         | MSK1           | serine/threonine protein kinase 2                           |
| FLT3          | FMS-like tyrosine kinase 3                                                          | MST2           | mammalian sterile 20-like kinases 1                         |
| FYN           | FYN proto-oncogene encoded tyrosine kinase                                          | NEK2           | NIMA-related kinase 2                                       |
| GSK3          | glycogen synthase kinase                                                            | P38 $\alpha$   | p38 mitogen-activated protein kinase $\alpha$               |
| HCK           | Hemopoietic cell kinase                                                             | P38 $\beta$    | p38 mitogen-activated protein kinase $\beta$                |
| p70S6K        | ribosomal protein S6 kinase beta 1                                                  | PDGFR $\alpha$ | platelet-derived growth factor receptor $\alpha$            |
| PDK1          | pyruvate dehydrogenase kinase 1                                                     | PI3K $\alpha$  | phosphoinositide 3-kinase (PI3K) $\alpha$                   |
| PI3K $\delta$ | phosphoinositide 3-kinase (PI3K) $\delta$                                           | PKACa          | PRKACA gene encoded kinase                                  |
| PKCa          | protein kinase C a                                                                  | c-Raf          | RAF proto-oncogene serine/threonine-protein kinase          |
| RET           | REarranged during Transfection (RET) proto-oncogene encoded protein tyrosine kinase | ROCK2          | Rho-associated coiled-coil-containing protein kinase 2      |
| RSK1          | ribosomal protein S6 kinase alpha 1                                                 | SGK            | serum/glucocorticoid regulated kinase 1                     |
| c-SRC         | c-Src protein tyrosine kinase                                                       | SYK            | spleen-associated tyrosine kinase                           |
| YES           | YES proto-oncogene encoded tyrosine kinase                                          | ZAP70          | zeta-chain-associated protein kinase 70                     |
